# Supplementary material
Source: HighWire-hosted journal article supplement (http://www.qdcxjkg.com/highwire/filestream/113921/field_highwire_adjunct_files/0/42-5_CME.pdf)
Supplement: 42-5_CME.pdf [file 42-5_CME.pdf]

# CME Credit Application Form

## (1 CME credit)

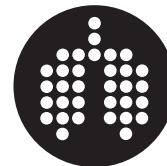

To receive CME credits, read the CME article in this issue, indicate the correct responses to the educational questions and complete the requested information. This form is also available in electronic format at [www.erj.ersjournals.com/current.dtl](http://www.erj.ersjournals.com/current.dtl). To return your application, you can either:

- ▶ use this form and return it completed to ERS Publications Office, 442 Glossop Road, Sheffield, S10 2PX, UK; fax to +44-114-2665064; or e-mail to [info@ersj.org.uk](mailto:info@ersj.org.uk)
- ▶ fill in the online form at [www.erj.ersjournals.com/current.dtl](http://www.erj.ersjournals.com/current.dtl)

Certificates will be e-mailed to the address filled in below. Please allow 4 weeks for processing.

**CME credit applications are now free of charge.**

### Applicant personal details.

ERS Membership No. (if known): ..... Date of Birth (DD/MM/YYYY): .....

Family Name: ..... First Name: .....

Mailing Address: .....

.....

Postal Code: ..... City: ..... Country: .....

Telephone: + ..... E-mail: .....

### Educational questions.

**“Determinants of endothelial function in patients with COPD”**  
For some questions more than one answer could be correct.

#### 1. Which of the following statements regarding endothelial function is true:

- Endothelial function has well defined and validated cut-off values.
- Endothelial function has predictive value for the future occurrence of cardiovascular events.
- Assessment of flow-mediated dilatation as a marker of endothelial function is user independent.
- Only invasive assessment of endothelial function allows cardiovascular risk assessment.

#### 2. Which of the following is a significant determinant of endothelial function in COPD?

- Sex.
- Total lung capacity.
- Breathing rate.
- FEV<sub>1</sub>.

#### 3. Which one of the following statements regarding physical activity in COPD is true?

- COPD patients who are regularly physically active have a lower risk of COPD related hospital admissions.
- Physical activity is only reduced in patients with severe COPD.
- Physically active COPD patients are more prone to impairment of endothelial function as compared to their inactive counterparts.
- Physical activity in severe COPD is contraindicated due to the risk of exercise induced hypoxemia.

#### 4. Which one of the following statements in COPD is false?

- FEV<sub>1</sub> is independently associated with endothelial function in moderate to severe COPD.
- Oxidative stress is independently associated with endothelial function in moderate-to-severe COPD.
- Heart rate is significantly higher in patients with severe COPD compared with patients with mild-to-moderate COPD.
- The association between FEV<sub>1</sub> and impaired endothelial function is modified by the level of physical activity.
